# Supplementary material for: Feasibility of paper microzone plates for greener determination of the alcoholic content of beverages by thermal infrared enthalpimetry
Source: Royal Society of Chemistry journal article supplement (doi:10.1039/c9ay01587f), 2019-01-01
Supplement: c9ay01587f1.pdf [file c9ay01587f1.pdf]

## Supplementary information

### **Manuscript:** *Feasibility of Paper Microzone Plates for Greener Determination of Alcoholic Content of Beverages by Thermal Infrared Enthalpimetry*

**S1.** Analytical signals obtained from reaction of (I) ethanol and water, and (II) water and ethanol where  $T_i$  is initial temperature and  $T_f$  is final temperature.

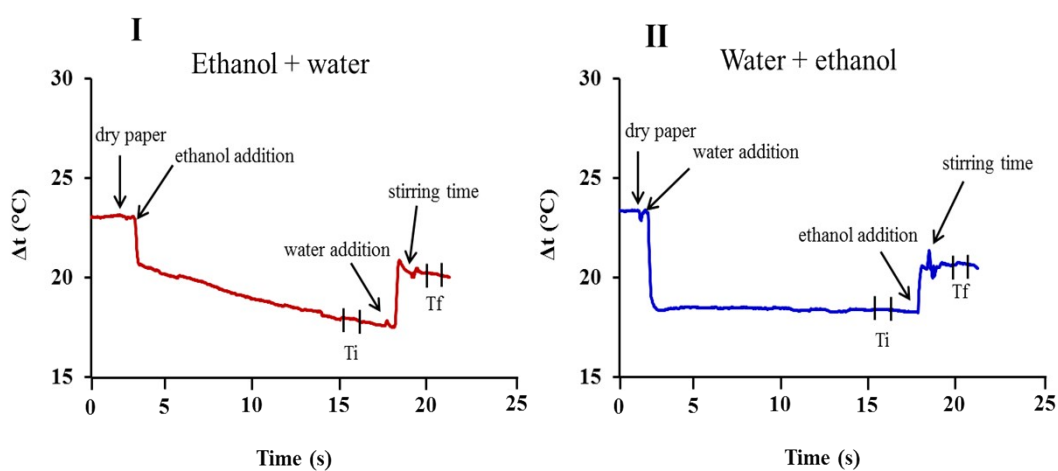

**S2.** Calibration curve obtained using reference hydroalcoholic solutions (25–60%, v/v). Error bars are reported as standard deviation of measurements (n = 24).

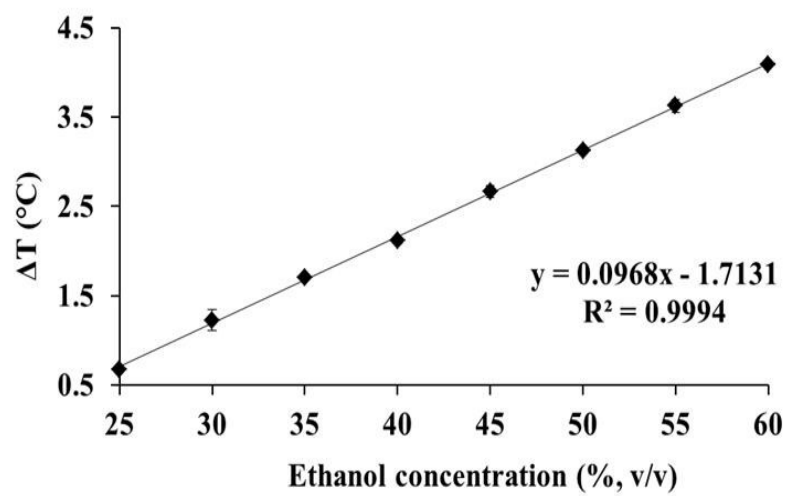

**S3.** GAPI parameters for analytical procedures for determination of ethanol content of distilled beverage by TIE-P, TIE-PS and AOAC 942.06.

| <b>Category</b>                    | <b>TIE-P</b>                                                         | <b>TIE-PS</b>                                                        | <b>AOAC 942.06</b>                                     |
|------------------------------------|----------------------------------------------------------------------|----------------------------------------------------------------------|--------------------------------------------------------|
| <b>Sample Preparation</b>          |                                                                      |                                                                      |                                                        |
| Collection                         | -                                                                    | -                                                                    | -                                                      |
| Preservation                       | Unnecessary                                                          | Unnecessary                                                          | Unnecessary                                            |
| Transport                          | -                                                                    | -                                                                    | -                                                      |
| Storage                            | Store the sample at room temperature and without light               | Store the sample at room temperature and without light               | Store the sample at room temperature and without light |
| Type of method: direct or indirect | Unnecessary sample preparation and determination in the same reactor | Unnecessary sample preparation and determination in the same reactor | Requires a preliminary stage of distillation           |
| Scale of sample preparation        | -                                                                    | -                                                                    | -                                                      |
| Solvents/reagents used             | Green solvents/reagents used                                         | Green solvents/reagents used                                         | Green solvents/reagents used                           |
| Additional treatments              | None                                                                 | None                                                                 | Weighing the solution after distillation               |
| <b>Reagent and Solvents</b>        |                                                                      |                                                                      |                                                        |
| Amount                             | 0.05 mL of water<br>0.05 mL of ethanol standard/sample               | 1.2 mL of water<br>1.2 mL of ethanol standard/sample                 | 100 mL of sample<br>100 mL of water                    |
| Health hazard                      | Green solvents                                                       | Green solvents                                                       | Green solvents                                         |
| Safety hazard                      | Low flammability or instability                                      | Low flammability or instability                                      | Low flammability or instability                        |
| <b>Instrumentation</b>             |                                                                      |                                                                      |                                                        |
| Energy                             | 0.001                                                                | 0.001                                                                | 10.67                                                  |
| Occupational hazard                | -                                                                    | -                                                                    | -                                                      |
| Waste                              | 0.01 mL                                                              | 2.4 mL                                                               | 200 mL                                                 |
| Waste treatment                    | Requires degradation                                                 | Requires passivation                                                 | Requires passivation                                   |
| <b>Quantification</b>              | Yes                                                                  | Yes                                                                  | Yes                                                    |

**S4.** Comparison of analytical parameters for selected analytical methods described in literature for the determination of alcoholic content of beverages.

| <b>Technique</b>                                                            | <b>Sample</b>                         | <b>LOD</b>              | <b>R<sup>2</sup></b> | <b>RSD</b>  | <b>Reference</b> |
|-----------------------------------------------------------------------------|---------------------------------------|-------------------------|----------------------|-------------|------------------|
| Attenuated total reflectance spectroscopy                                   | Gin, rum, vodka, whisky and wine      | <i>n.i</i>              | 0.9910               | <i>n.i</i>  | S1               |
| Colorimetry using a Smartphone                                              | Beer, wine, vodka and cachaça         | 0.25%                   | 0.999                | 0.76-5.97%  | S2               |
| Colorimetry using a Smartphone                                              | Cachaça                               | 0.19%                   | 0.9963               | 0.1-0.2%    | S3               |
| Colorimetry using a Smartphone                                              | Distilled beverages                   | 2.1%                    | 0.998                | 1.2%        | S4               |
| Capillary electrophoresis by photo-oxidation assisted ultraviolet detection | Vodka                                 | 34.9 mg L <sup>-1</sup> | 0.987-0.999          | <i>n.i</i>  | S5               |
| Electrochemical paper-based microfluidic devices (ePADs)                    | Beer                                  | 0.25 mM                 | 0.9898               | 15%         | S6               |
| Fluorometric detection                                                      | Distilled beverages, beer and yogurts | 1-1.86%                 | 0.9630-0.9934        | 1.33%       | S7               |
| FIA amperometric                                                            | Sugar cane spirit, sake, rum and wine | 0.4%                    | 0.998                | 1.83 -7.07% | S8               |
| Gas Chromatography (GC)                                                     | Red wine and whisky                   | 0.5 µg/mL*              | 0.999                | 2.1 -3.4%   | S9               |

|                                                        |                                                  |                |            |               |           |
|--------------------------------------------------------|--------------------------------------------------|----------------|------------|---------------|-----------|
| Gas Chromatography (GC)                                | Wine                                             | 1.23% *        | 0.999      | 1.02%         | S10       |
| High performance liquid chromatography (HPLC)          | White and red wine, sake, shochu, brandy, whisky | <i>n.i</i>     | <i>n.i</i> | 1.44- 2.36%   | S11       |
| Instrument-free method based on visible chemical waves | Beer, colored whisky, and vodka                  | <i>n.i</i>     | 0.9980     | < 3%          | S12       |
| NIR and Raman spectrometry                             | Whisky, vodka and sugary alcoholic drinks        | <i>n.i</i>     | <i>n.i</i> | 0.5-2.3%      | S13       |
| Potentiometric microbial biosensor                     | Solution of ethanol                              | <i>n.i</i>     | 0.9972     | >6%           | S14       |
| Raman spectroscopy                                     | Solution of ethanol                              | 1.2 mM         | 0.998      | 2.9-5.9%      | S15       |
| Redox titration, paper-based analytical devices        | Whiskey                                          | 2.1%           | 0.992      | 0.8-9.4%      | S16       |
| TIE-flow                                               | Cachaça, cognac, and vodka                       | 23.41%         | 0.9961     | 0.26-2%       | S17       |
| TIE-P                                                  | Vodka, cachaça and gym                           | 19.7%          | 0.9994     | 0.5-2.9%      | This work |
| TIE                                                    | Vodka, whisky, and cachaça                       | 18.7%          | 0.99995    | 0.73 -1.07%   | S18       |
| TIE                                                    | Wine                                             | 0.58% - 1.05%, | 0.9987     | 0.98 to 1.80% | S19       |

*n.i*: not informed

\* limit of quantification (LOQ) informed

TIE: Thermal infrared enthalpimetry

## References

- S1. R. Nagarajan, A. Gupta, R. Mehrotra and M. M. Bajaj, *Journal of Automated Methods and Management in Chemistry*, 2006, **2006**, 5.
- S2. L. P. D. Benedetti, V. B. dos Santos, T. A. Silva, E. Benedetti, V. L. Martins and O. Fatibello, *Analytical Methods*, 2015, **7**, 4138-4144.
- S3. F. C. Bock, G. A. Helfer, A. B. da Costa, M. B. Dessuy and M. F. Ferrao, *Food Analytical Methods*, 2018, **11**, 1951-1957.
- S4. O. R. Marinho, M. J. A. Lima, F. R. P. Rocha, B. F. Reis and M. Y. Kamogawa, *Microchemical Journal*, 2019, **147**, 437-443.
- S5. J. D. Oliver, M. Gaborieau and P. Castignolles, *Journal of Chromatography A*, 2014, **1348**, 150-157.
- S6. F. J. V. Gomez, P. A. Reed, D. Gonzalez Casamachin, J. Rivera de la Rosa, G. Chumanov, M. F. Silva and C. D. Garcia, *Analytical Methods*, 2018, **10**, 4020-4027.
- S7. N. L. T. Nguyen, S. H. Baek, Z. A. Akbar, S. Y. Jang, S. Ha, J. P. Park and T. J. Park, *Biochip Journal*, 2018, **12**, 240-248.
- S8. T. Paixao, D. Corbo and M. Bertotti, *Analytica Chimica Acta*, 2002, **472**, 123-131.
- S9. M.-L. a. C. Wang, Youk-Meng and Su, Nan-Wei and Lee, Min-Hsiung, *Journal of Food and Drug Analysis*, 2003, **11**, 133-140.
- S10. C. Y. Zhang, N. B. Lin, X. S. Chai, L. Zhong and D. G. Barnes, *Food Chemistry*, 2015, **183**, 169-172.
- S11. T. Yarita, R. Nakajima, S. Otsuka, T. Ihara, A. Takatsu and M. Shibukawa, *Journal of Chromatography A*, 2002, **976**, 387-391.
- S12. T. Somboon and S. Sansuk, *Food Chemistry*, 2018, **253**, 300-304.

- S13. A. Nordon, A. Mills, R. T. Burn, F. M. Cusick and D. Littlejohn, *Analytica Chimica Acta*, 2005, **548**, 148-158.
- S14. L. Rotariu, C. Bala and V. Magearu, *Analytica Chimica Acta*, 2004, **513**, 119-123.
- S15. I. H. Boyaci, H. E. Genis, B. Guven, U. Tamer and N. Alper, *Journal of Raman Spectroscopy*, 2012, **43**, 1171-1176.
- S16. S. A. Nogueira, A. D. Lemes, A. C. Chagas, M. L. Vieira, M. Talhavini, P. A. O. Morais and W. K. T. Coltro, *Talanta*, 2019, **194**, 363-369.
- S17. R. B. d. Santos, P. F. Filoda, I. D. Teixeira, G. A. Helfer, R. O. Santos, A. S. Oliveira, J. S. Barin, B. Tischer and A. B. d. Costa, *Talanta*, 2019, **200**, 67-71.
- S18. A. S. Oliveira, F. M. Dalla Nora, R. O. Mello, P. A. Mello, B. Tischer, A. B. Costa and J. S. Barin, *Talanta*, 2017, **171**, 335-340.
- S19. A. S. Oliveira, C. A. Ballus, C. R. Menezes, R. Wagner, J. N. G. Paniz, B. Tischer, A. B. Costa and J. S. Barin, *Food Chemistry*, 2018, **258**, 59-62.
